# Supplementary material for: Assessment of Intratumoral and Peritumoral Computed Tomography Radiomics for Predicting Pathological Complete Response to Neoadjuvant Chemoradiation in Patients With Esophageal Squamous Cell Carcinoma
Source: PubMed Central journal article supplement (PMC7489831; doi:10.1001/jamanetworkopen.2020.15927), 2020-09-10
Supplement: jamanetwopen-e2015927-s001.pdf [file jamanetwopen-e2015927-s001.pdf]

## Supplementary Online Content

Hu Y, Xie C, Yang H, et al. Assessment of intratumoral and peritumoral computed tomography radiomics for predicting pathological complete response to neoadjuvant chemoradiation in patients with esophageal squamous cell carcinoma. *JAMA Netw Open*. 2020;3(9):e2015927. doi:10.1001/jamanetworkopen.2020.15927

**eAppendix 1.** Supplemental Methods

**eReferences.**

**eFigure 1.** Flowchart of Patient Selection

**eFigure 2.** Stratification of the Combined Model by the Baseline Tumor Volume in Voxel Size

**eFigure 3.** Calibration Curve of the Optimal Combined Radiomics Model

**eFigure 4.** Decision Curve of the Optimal Combined Radiomics Model

**eFigure 5.** Diagnostic Possibilities Calculated by the Combined Radiomics Model for Each Patient

**eFigure 6.** Enrichment Map for Enriched Gene Sets Associated With the Combined Radiomics Model and the Intratumoral Model

**eTable 1.** Comparison of Predictive Performance Across Different Classifiers

**eTable 2.** Radiomics Features in the Intratumoral and Peritumoral Models

**eTable 3.** Number of Selected Features Across Different Classifiers

**eTable 4.** Univariable Analysis on Radiomics Models and Clinical Factors Associated for pCR

**eTable 5.** Stratified Prediction Performance in Different Risk Subgroups

**eTable 6.** Clusters of Gene Sets for the Enrichment Analysis

**eTable 7.** Numbers of Selected Features Through the Construction Procedure of the Combined Radiomics Model

**eAppendix 2.** Ranked Gene List

This supplementary material has been provided by the authors to give readers additional information about their work.

## eAppendix 1. Supplemental Methods

### 1. Neoadjuvant chemoradiotherapy regimens

For institution 1, 75 mg/m<sup>2</sup> cisplatin on day 1 and 25 mg/m<sup>2</sup> vinorelbine on days 1 and 8 for 2 cycles, or 25 mg/m<sup>2</sup> cisplatin and 25 mg/m<sup>2</sup> docetaxel on days 1, 8, 15 and 21 were administered intravenously, with a total dose of 40 or 44 Gy for concurrent radiotherapy. For institution 2, patients received 50 mg/m<sup>2</sup> paclitaxel and carboplatin AUC 2 for 5 cycles or 100 mg/m<sup>2</sup> cisplatin and 500 mg/m<sup>2</sup> fluorouracil for 4 days for weeks 1 and 5, with a total dose of 40 or 41.4 Gy for concurrent radiotherapy.

### 2. CT image acquisition

| Parameter                                     | Institution 1                                                                                             | Institution 2                                               |
|-----------------------------------------------|-----------------------------------------------------------------------------------------------------------|-------------------------------------------------------------|
| Scanner                                       | Aquilion TSX-101A (Toshiba Medical Systems, Tokyo, JP) or Discovery 750 HD (GE Healthcare, Milwaukee, WI) | Discovery VCT, GE Healthcare (GE Healthcare, Milwaukee, WI) |
| Dose of iodinated CT contrast agent           | 1.5 ml/kg                                                                                                 | 100 mL                                                      |
| Injection rate of iodinated CT contrast agent | 2.5 ml/s                                                                                                  | 3 ml/s                                                      |
| Slice thickness (mm)                          | 2.5 (median)                                                                                              | 5 (median)                                                  |
| Tube voltage (kVp)                            | 120                                                                                                       | 120                                                         |
| Tube current (mA)                             | 200-400                                                                                                   | 200-300                                                     |

### 3. Radiomics Feature extraction and definitions

The resampled voxel sizes were set to 1×1×5 mm<sup>3</sup> voxels to standardize the slice thickness. Image intensities were binned by 25 HU and voxel array shift was set on 1000. Care was taken to threshold the Hounsfield units (HU) of the CT scan (-100~400 HU) in order to remove air and bone pixels. Original images depicted the baseline structural characteristics. Wavelet filtration (high and low pass filters) filtered original images directionally with x, y and z directions respectively, yielding 8 different combinations of decompositions. LoG filter, also called edge enhancement filter, convolved the image with the second derivative (Laplacian) of a Gaussian kernel. The Gaussian kernel is sensitive to areas with rapidly changing intensities and enhancing edges. The width of the filter in the Gaussian kernel is determined by  $\sigma$  and we adopted  $\sigma$  with the range of 1-5 mm at 1 mm interval to achieve both fine (low  $\sigma$  values) and coarse (high  $\sigma$  values) textures. These filtrations could capture more detailed disruptions in different orientations.

The features can be divided into 3 groups: (a) first-order statistics, describing commonly used and basic metrics for distributions of the voxel intensity within the ROI; (b) shape features, including descriptors of the two-dimensional and three-dimensional morphological properties (size and shape) of the ROI; and (c) second-order features, consisting of high-dimensional textual features quantifying the spatial distribution of pixel intensities in all three-dimensional directions, which takes the spatial distribution of each voxel and the neighboring voxels into consideration. Most features defined below were in accordance with feature definitions as described by the Imaging Biomarker Standardization Initiative (IBSI), which were available in a separate document by Zwanenburg et al. (2016).<sup>1</sup> Here, we show the description of the radiomic features used in our optimal combined model:

## 2.1 First order features

First-order statistics describe the distribution of voxel intensities within the image region defined by the mask through commonly used and basic metrics.

Let:

- $\mathbf{X}$  be a set of  $Np$  voxels included in the ROI
- $\mathbf{P}(i)$  be the first order histogram with  $Ng$  discrete intensity levels, where  $Ng$  is the number of non-zero bins, equally spaced from 0 with a width defined in the bin width parameter
- $p(i)$  be the normalized first order histogram and equal to  $\mathbf{P}(i)/Np$

### 1) Median

The median gray level intensity within the ROI.

### 2) Kurtosis

$$kurtosis = \frac{\mu_4}{\sigma^4} = \frac{\frac{1}{Np} \sum_{i=1}^{Np} (\mathbf{X}(i) - \bar{X})^4}{\left( \frac{1}{Np} \sum_{i=1}^{Np} (\mathbf{X}(i) - \bar{X})^2 \right)^2}$$

Where  $\mu_4$  is the 4<sup>th</sup> central moment.

Kurtosis is a measure of the ‘peakedness’ of the distribution of values in the image ROI. A higher kurtosis implies that the mass of the distribution is concentrated towards the tail(s) rather than towards the mean. A lower kurtosis implies the reverse: that the mass of the distribution is concentrated towards a spike near the Mean value.

## 2.2 Second order features

### 2.2.1 Gray Level Size Zone Matrix (GLSZM) Features

A Gray Level Size Zone (GLSZM) quantifies gray level zones in an image. A gray level zone is defined as the number of connected voxels that share the same gray level intensity. A voxel is considered connected if the distance is 1 according to the infinity norm (26-connected region in a 3D, 8-connected region in 2D). In a gray level size zone matrix  $P(i,j)$  the  $(i,j)$ <sup>th</sup> element equals the number of zones with gray level  $i$  and size  $j$  appear in image. Contrary to GLCM and GLRLM, the GLSZM is rotation independent, with only one matrix calculated for all directions in the ROI.<sup>2</sup> As a two-dimensional example, consider the following 5x5 image, with 5 discrete gray levels:

$$\mathbf{I} = \begin{bmatrix} 5 & 2 & 5 & 4 & 4 \\ 3 & 3 & 3 & 1 & 3 \\ 2 & 1 & 1 & 1 & 3 \\ 4 & 2 & 2 & 2 & 3 \\ 3 & 5 & 3 & 3 & 2 \end{bmatrix}$$

The GLSZM then becomes:

$$\mathbf{P} = \begin{bmatrix} 0 & 0 & 0 & 1 & 0 \\ 1 & 0 & 0 & 0 & 1 \\ 1 & 0 & 1 & 0 & 1 \\ 1 & 1 & 0 & 0 & 0 \\ 3 & 0 & 0 & 0 & 0 \end{bmatrix}$$

Let:

- $N_g$  be the number of discrete intensity values in the image
- $N_s$  be the number of discrete zone sizes in the image
- $N_p$  be the number of voxels in the image
- $N_z$  be the number of zones in the ROI, which is equal to  $\sum_{i=1}^{N_g} \sum_{j=1}^{N_s} \mathbf{P}(i, j)$  and  $1 \leq N_z \leq N_p$
- $\mathbf{P}(i, j)$  be the size zone matrix
- $p(i, j)$  be the normalized size zone matrix, defined as  $p(i, j) = \frac{\mathbf{P}(i, j)}{N_z}$

1) Large Area Low Gray Level Emphasis (LALGLE)

$$LALGLE = \frac{\sum_{i=1}^{N_g} \sum_{j=1}^{N_s} \frac{\mathbf{P}(i, j) j^2}{i^2}}{N_z}$$

LALGLE measures the proportion in the image of the joint distribution of larger size zones with lower gray-level values.

2) Gray Level Non-Uniformity Normalized (GLNN)

$$GLNN = \frac{\sum_{i=1}^{N_g} \left( \sum_{j=1}^{N_s} \mathbf{P}(i, j) \right)^2}{N_z^2}$$

GLNN measures the variability of gray-level intensity values in the image, with a lower value indicating a greater similarity in intensity values. This is the normalized version of the GLN formula.

### 2.2.2 Gray Level Co-occurrence Matrix (GLCM) Features

A Gray Level Co-occurrence Matrix (GLCM)<sup>3</sup> of size  $N_g \times N_g$  describes the second-order joint probability function of an image region constrained by the mask and is defined as  $\mathbf{P}(i, j | \delta, \theta)$ . The  $(i, j)^{\text{th}}$  element of this matrix represents the number of times the combination of levels  $i$  and  $j$  occur in two pixels in the image, that are separated by a distance of  $\delta$  pixels along angle  $\theta$ . The distance  $\delta$  from the center voxel is defined as the distance according to the infinity norm. For  $\delta=1$ , this results in 2 neighbors for each of 13 angles in 3D (26-connectivity) and for  $\delta=2$  a 98-connectivity (49 unique angles).

As a two-dimensional example, let the following matrix  $\mathbf{I}$  represent a 5x5 image, having 5 discrete grey levels:

$$\mathbf{I} = \begin{bmatrix} 1 & 2 & 5 & 2 & 3 \\ 3 & 2 & 1 & 3 & 1 \\ 1 & 3 & 5 & 5 & 2 \\ 1 & 1 & 1 & 1 & 2 \\ 1 & 2 & 4 & 3 & 5 \end{bmatrix}$$

For distance  $\delta=1$  (considering pixels with a distance of 1 pixel from each other) and angle  $\theta=0^\circ$  (horizontal plane, i.e. voxels to the left and right of the center voxel), the following symmetrical GLCM is obtained:

$$\mathbf{P} = \begin{bmatrix} 6 & 4 & 3 & 0 & 0 \\ 4 & 0 & 2 & 1 & 3 \\ 3 & 2 & 0 & 1 & 2 \\ 0 & 1 & 1 & 0 & 0 \\ 0 & 3 & 2 & 0 & 2 \end{bmatrix}$$

Let:

- $\epsilon$  be an arbitrarily small positive number ( $\approx 2.2 \times 10^{-16}$ )
- $\mathbf{P}(i,j)$  be the co-I matrix for an arbitrary  $\delta$  and  $\theta$
- $p(i,j)$  be the normalized co-I matrix and equal to  $\mathbf{P}(i,j) / \sum \mathbf{P}(i,j)$
- $N_g$  be the number of discrete intensity levels in the image
- $p_x(i) = \sum_{j=1}^{N_g} p(i,j)$  be the marginal row probabilities
- $p_y(j) = \sum_{i=1}^{N_g} p(i,j)$  be the marginal column probabilities
- $\sigma_x$  be the standard deviation of  $p_x$
- $\sigma_y$  be the standard deviation of  $p_y$

By default, the value of a feature is calculated on the GLCM for each angle separately, after which the mean of these values is returned.

#### 1) Inverse Difference Moment (IDM)

$$IDM = \sum_{k=0}^{N_g-1} \frac{p_{x-y}(k)}{1+k^2}$$

IDM (a.k.a Homogeneity 2) is a measure of the local homogeneity of an image. IDM weights are the inverse of the Contrast weights (decreasing exponentially from the diagonal  $i=j$  in the GLCM).

#### 2) Sum Average

$$sum\ average = \sum_{k=2}^{2N_g} p_{x+y}(k)k$$

Sum Average measures the relationship between occurrences of pairs with lower intensity values and occurrences of pairs with higher intensity values.

### 3) Inverse Variance

$$\text{inverse variance} = \sum_{k=1}^{N_g-1} \frac{p_{x-y}(k)}{k^2}$$

Note that  $k=0$  is skipped, as this would result in a division by 0.

### 4) Cluster Shade

$$\text{cluster shade} = \sum_{i=1}^{N_g} \sum_{j=1}^{N_g} (i + j - \mu_x - \mu_y)^3 p(i, j)$$

Cluster Shade is a measure of the skewness and uniformity of the GLCM. A higher cluster shade implies greater asymmetry about the mean.

## 4. RNA sequencing procedure

Total RNA was isolated using AllPrep DNA/RNA Mini Kit (Qiagen) from 40 frozen specimens acquired through endoscopic biopsies in institution 1. RNA purity and concentration were measured by NanoDrop 2000 Microvolume UV-Vis spectrophotometer (Thermo Scientific). RNA quality was estimated by RNA integrity number (RIN) on the 2100 Bioanalyzer (Agilent) and samples with RIN over 6.0 were ensured for library construction. We used the Epicentre Ribo-zero rRNA Removal Kit (Epicentre) to remove ribosomal RNA (rRNA), and proceeded to generate libraries by using the NEBNext Ultra Directional RNA Library Prep Kit for Illumina (New England Biolabs). The first-strand cDNA was synthesized using random primers and reverse transcriptase followed by the synthesis of the second-strand cDNA by DNA Polymerase I and Rnase H. Then, DNA fragments underwent adenylation of the 3' ends and ligation of sequencing adapters. After cDNA purification on the AMPure XP system (Beckman Coulter), the quality and quantity of libraries were assessed by the 2100 Bioanalyzer (Agilent). Finally, the cDNA libraries were placed on a cBot System (Illumina) for cluster generation and sequenced on the Illumina HiSeq 4000 Platform at the Novogene Bioinformatics Institute (Beijing, China) to generate 150 bp paired-end reads. Raw reads were stored in the FASTQ format. In order to gain clean data, reads that included adapters, contained high proportion of N for no base information, or had low quality were removed. Clean reads were aligned to the hg19 human genome using TopHat v2.1.1, and mapped reads were assembled for each sample by Cufflinks v2. Annotation was performed according to the RefSeq database for mRNA and the GENCODE v21 database for lncRNA. To assess expression level, read counts were normalized and calculated as fragments per kilobase of exon per million fragments (FPKM) by Cuffdiff v2.2.1.

## 5. R packages

Radiomics features were harmonized to reduce the multicenter effect caused by different scanner and protocol settings. According to the statistical distribution of the dataset, nonparametric form of the model was adopted in which ComBat determined the transformation for each feature separately using “sva” R package.<sup>4</sup> Feature robustness was tested by intraclass correlation coefficients (ICCs) using “irr” R package.<sup>5</sup> The AUC of the receiver operating characteristic (ROC) curve was calculated and compare by “pRCO” R package.<sup>6</sup> The raw genomic data was preprocessed (background correction, log2-transformation and quantile normalization) using the Bioconductor package “affy”.<sup>7</sup>

## eReferences

1. Zwanenburg A, Leger S, Vallières M, Löck S. Image biomarker standardisation initiative. *J arXiv preprint arXiv:07003*. 2016.
2. Thibault G, Fertil B, Navarro C, et al. Shape and texture indexes application to cell nuclei classification. *J International Journal of Pattern Recognition Artificial Intelligence*. 2013;27(01):1357002.
3. Haralick RM, Shanmugam K, Dinstein IHJITos, man,, cybernetics. Textural features for image classification. 1973(6):610-621.
4. Leek JT, Johnson WE, Parker HS, Jaffe AE, Storey JD. The sva package for removing batch effects and other unwanted variation in high-throughput experiments. *J Bioinformatics*. 2012;28(6):882-883.
5. Gamer M, Lemon J, Fellows I, Singh PJRANhcr-powpiip. Package irr: Various Coefficients of Interrater Reliability and Agreement (versión 0.84). 2012.
6. Robin X, Turck N, Hainard A, et al. pROC: an open-source package for R and S+ to analyze and compare ROC curves. *BMC Bioinformatics*. 2011;12:77.
7. Gautier L, Cope L, Bolstad BM, Irizarry RA. affy—analysis of Affymetrix GeneChip data at the probe level. *J Bioinformatics*. 2004;20(3):307-315.

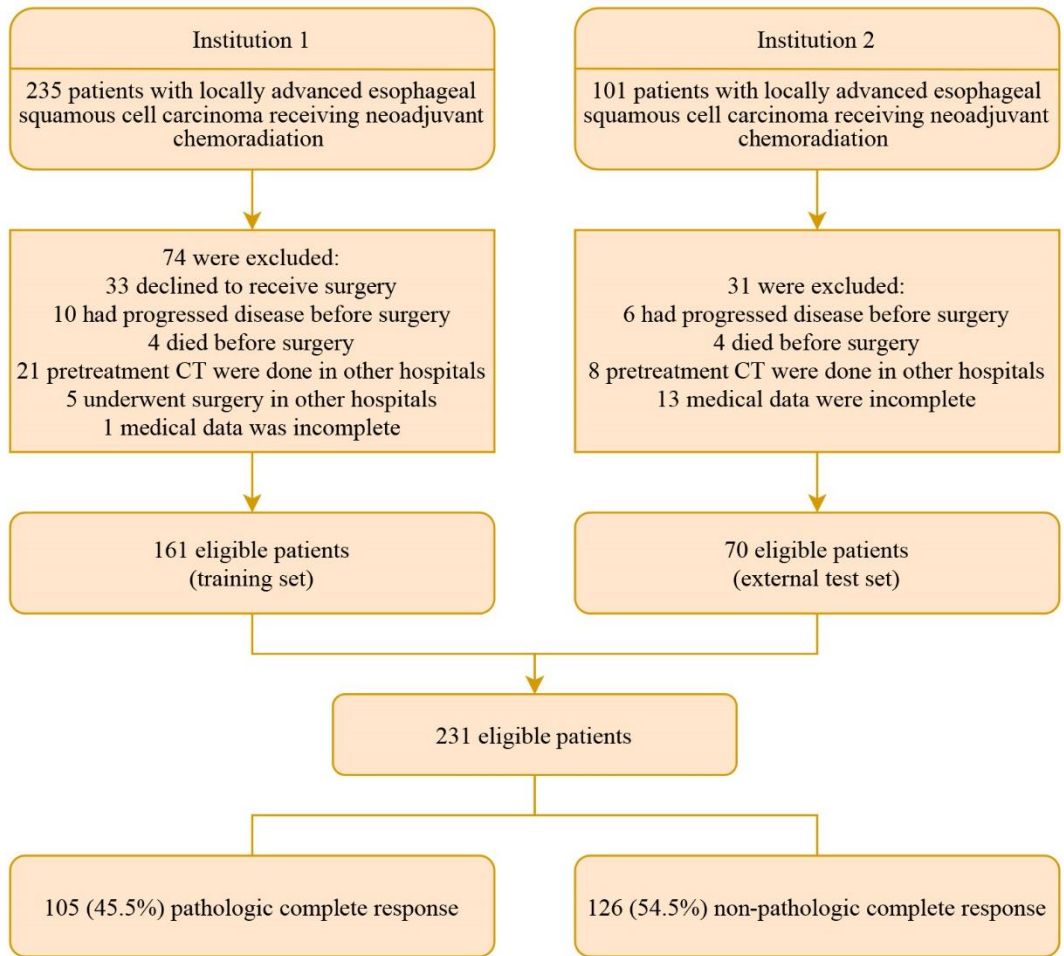

**eFigure 1. Flowchart of Patient Selection.**



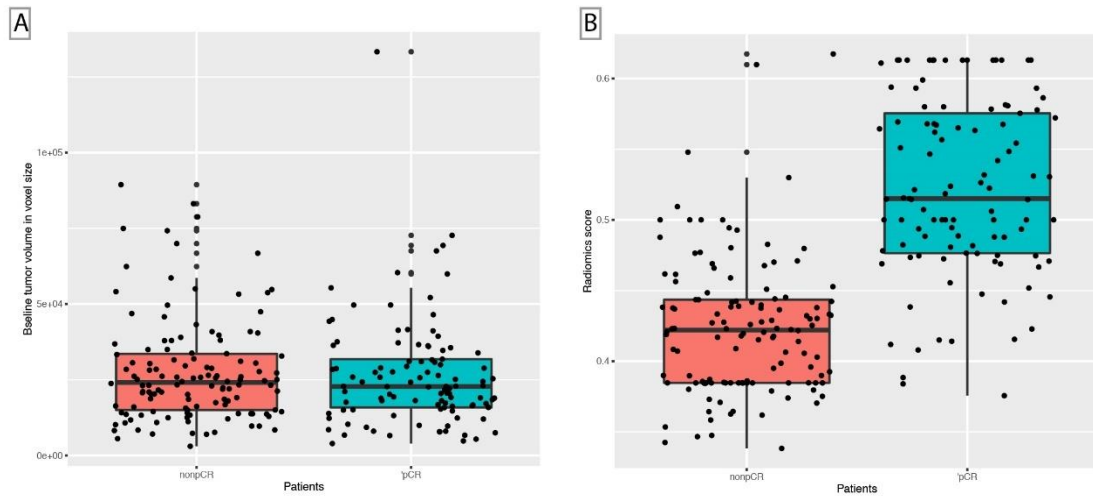

**eFigure 2. Stratification of the Combined Model by the Baseline Tumor Volume in Voxel Size.** Boxplots for pCR and non-pCR patients divided by (A) baseline tumor volume in voxel size (Univariable test,  $P=0.596$ ) and (B) radiomics score (Univariable test,  $P < 0.001$ ).

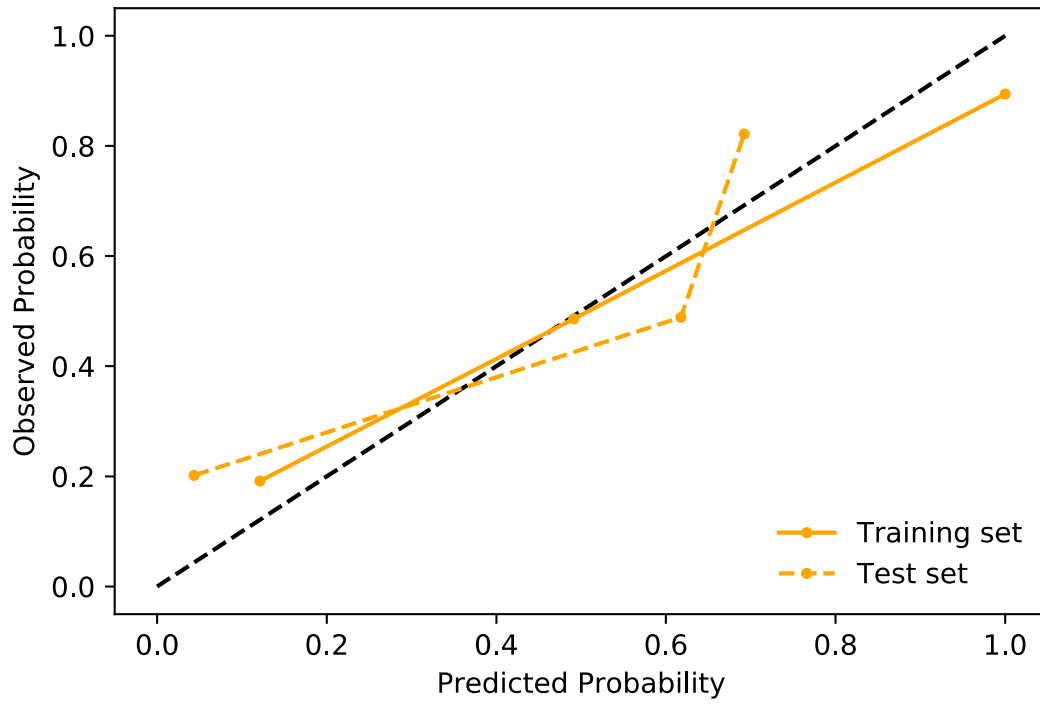

**eFigure 3. Calibration Curve of the Optimal Combined Radiomics Model**

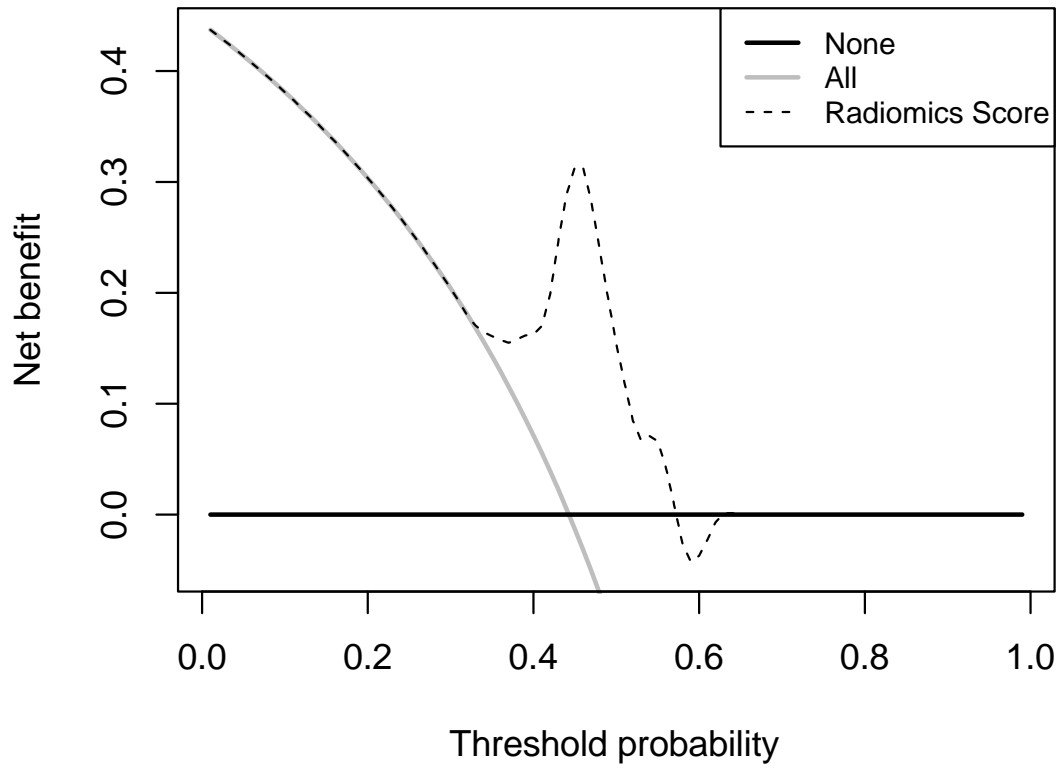

**eFigure 4. Decision Curve of the Optimal Combined Radiomics Model**

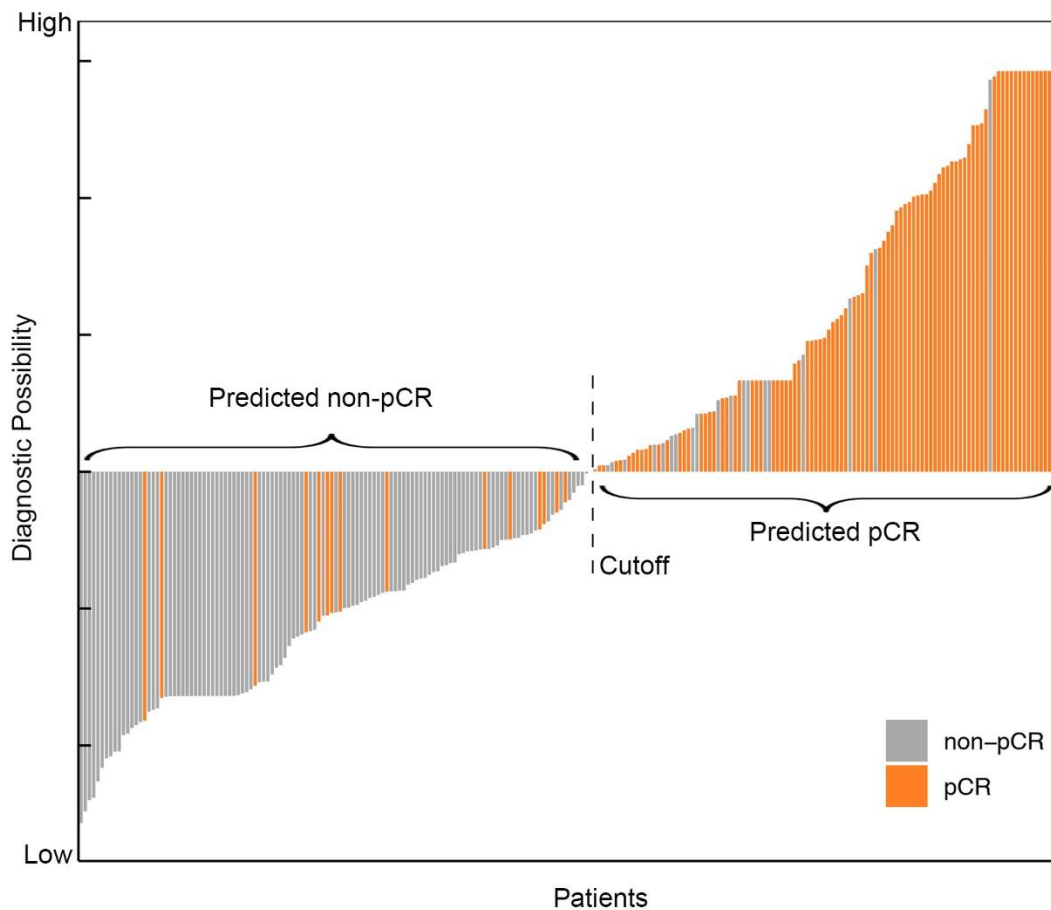

**Figure 5. Diagnostic Possibilities Calculated by the Combined Radiomics Model for Each Patient.** Orange and gray bars show scores for pCR and non-pCR patients, respectively. pCR indicates pathologic complete response.

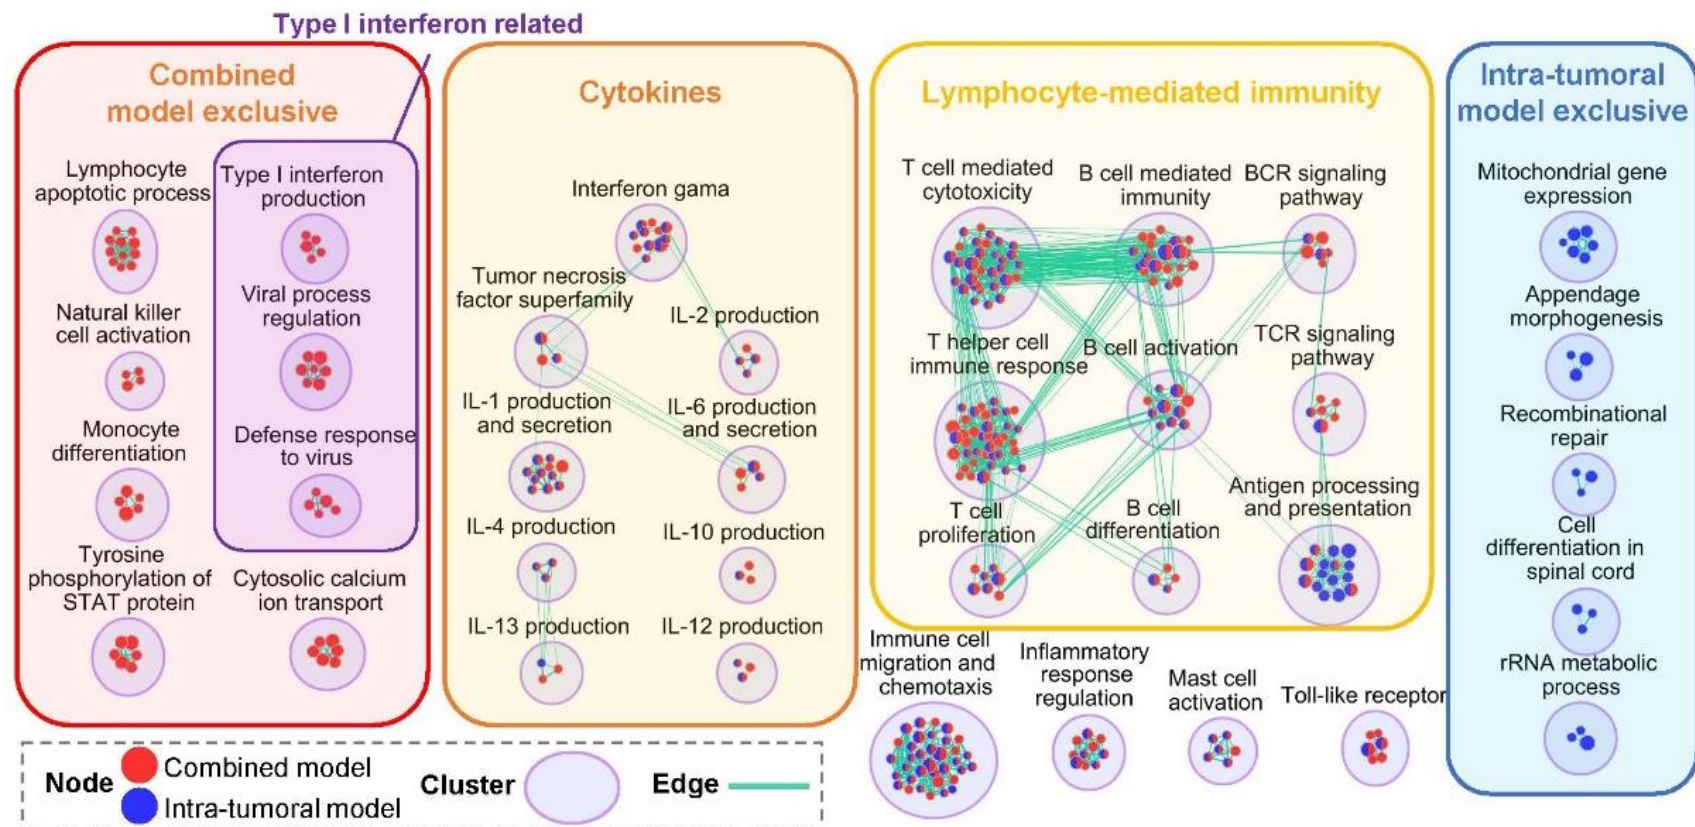

**eFigure 6. Enrichment Map for Enriched Gene Sets Associated With the Combined Radiomics Model and the Intratumoral Model.** Red and blue of node color represent enrichment in combined model and intra-tumoral model, respectively. Edges represent overlaps between gene sets. Clusters were generated using the AutoAnnotate application and manually modified and labeled.

**eTable 1. Comparison of Predictive Performance Across Different Classifiers**

| Classifier | AUC (95% CI)        |                     |                      |                     |                     |                     |
|------------|---------------------|---------------------|----------------------|---------------------|---------------------|---------------------|
|            | Intra-tumoral model |                     | Peri-tumoral model   |                     | Combined model      |                     |
|            | Training            | Test                | Training             | Test                | Training            | Test                |
| DC         | 1.000 (1.000-1.000) | 0.724 (0.620-0.828) | 1.000 (1.000-1.000)  | 0.688 (0.579-0.797) | 1.000 (1.000-1.000) | 0.740 (0.634-0.845) |
| KNN        | 0.769 (0.700-0.838) | 0.680 (0.559-0.802) | 0.847 (0.791-0.903)  | 0.675 (0.550-0.800) | 0.777 (0.708-0.845) | 0.746 (0.634-0.857) |
| Linear-SVM | 0.729 (0.650-0.808) | 0.660 (0.527-0.792) | 0.809 (0.742-0.876)  | 0.673 (0.545-0.802) | 0.812 (0.745-0.880) | 0.749 (0.672-0.872) |
| LR         | 0.793 (0.724-0.862) | 0.670 (0.535-0.805) | 0.886 (0.833-0.939)  | 0.625 (0.490-0.759) | 0.816 (0.752-0.880) | 0.701 (0.576-0.827) |
| NB         | 0.787 (0.717-0.857) | 0.700 (0.577-0.824) | 0.816 (0.747-0.885)  | 0.634 (0.504-0.765) | 0.900 (0.852-0.949) | 0.800 (0.696-0.904) |
| RBF-SVM    | 0.881 (0.827-0.935) | 0.730 (0.609-0.850) | 0.895 (0.847-0.943)  | 0.726 (0.609-0.843) | 0.906 (0.858-0.953) | 0.852 (0.753-0.951) |
| RF         | 1.000 (0.999-1.000) | 0.641 (0.512-0.770) | 1.000 (0.9992-1.000) | 0.676 (0.551-0.801) | 1.000 (1.000-1.000) | 0.725 (0.607-0.843) |
| XGboost    | 1.000 (1.000-1.000) | 0.699 (0.571-0.827) | 1.000 (1.000-1.000)  | 0.734 (0.613-0.854) | 1.000 (1.000-1.000) | 0.772 (0.652-0.891) |

Abbreviations: AUC, area under the receiver operating characteristic curve; DC, decision tree; KNN, k-nearest neighbors; linear-SVM, support vector machine with linear kernel; LR, linear regression; NB, naive bayes; RBF-SVM, support vector machine with radial basis function kernel; RF, random forest; XGboost, extreme gradient boosting.

**eTable 2. Radiomics Features in the Intratumoral and Peritumoral Models**

| Model                           | Filter <sup>a</sup>         | Feature class | Feature                             |
|---------------------------------|-----------------------------|---------------|-------------------------------------|
| Intra-tumoral model (RBF - SVM) | LoG ( $\sigma=1\text{mm}$ ) | GLCM          | Inverse Variance                    |
|                                 | LoG ( $\sigma=2\text{mm}$ ) | First order   | Kurtosis                            |
|                                 | LoG ( $\sigma=2\text{mm}$ ) | GLCM          | Inverse Variance                    |
|                                 | LoG ( $\sigma=3\text{mm}$ ) | First order   | 90 Percentile                       |
|                                 | Original                    | GLRLM         | Gray Level Variance                 |
|                                 | Original                    | GLRLM         | Run Entropy                         |
|                                 | Original                    | NGTDM         | Strength                            |
|                                 | Wavelet (HHH)               | GLSZM         | Size Zone Non-Uniformity Normalized |
|                                 | Wavelet (HHH)               | GLSZM         | Zone Variance                       |
|                                 | Wavelet (HHL)               | GLSZM         | Size Zone Non-Uniformity Normalized |
|                                 | Wavelet (HLH)               | First order   | Median                              |
|                                 | Wavelet (HLH)               | First order   | Root Mean Squared                   |
|                                 | Wavelet (HLL)               | First order   | 90 Percentile                       |
|                                 | Wavelet (LHH)               | GLDM          | Dependence Non-Uniformity           |
|                                 | Wavelet (LLH)               | First order   | Maximum                             |
| Wavelet (LLH)                   | NGTDM                       | Strength      |                                     |
| Peri-tumoral model (XGboost)    | Wavelet (HHH)               | First order   | Kurtosis                            |
|                                 | LoG ( $\sigma=4\text{mm}$ ) | GLRLM         | Run Percentage                      |
|                                 | Wavelet (LHH)               | GLRLM         | Long Run Low Gray Level Emphasis    |
|                                 | Wavelet (LHL)               | GLSZM         | Large Area Low Gray Level Emphasis  |
|                                 | Original                    | GLCM          | Inverse Variance                    |
|                                 | Original                    | GLCM          | Correlation                         |
|                                 | Original                    | NGTDM         | Busyness                            |
|                                 | Original                    | First order   | Variance                            |

Abbreviations: RBF-SVM, support vector machine with radial basis function kernel, XGboost, extreme gradient boosting; LoG indicates Laplacian of Gaussian; GLCM, Gray Level Co-occurrence Matrix; GLRLM, Gray Level Run Length Matrix; NGTDM, Neighboring Gray Tone Difference Matrix; GLSZM, Gray Level Size Zone Matrix; GLDM, Gray Level Dependence Matrix; MCC, Maximal Correlation Coefficient.

<sup>a</sup> For wavelet filtration, "H" and "L" represent high pass filter and low pass filter on the x, y, z directions.

**eTable 3. Number of Selected Features Across Different Classifiers**

| <b>Classifier</b> | <b>Intra-tumoral model</b> | <b>Peri-tumoral model</b> | <b>Combined model</b> |
|-------------------|----------------------------|---------------------------|-----------------------|
| DC                | 6                          | 4                         | 6                     |
| KNN               | 8                          | 12                        | 13                    |
| Linear-SVM        | 13                         | 17                        | 17                    |
| LR                | 18                         | 13                        | 14                    |
| NB                | 15                         | 14                        | 13                    |
| RBF-SVM           | 16                         | 9                         | 13                    |
| RF                | 5                          | 7                         | 13                    |
| XGboost           | 7                          | 8                         | 14                    |

Abbreviations: DC, decision tree; KNN, k-nearest neighbors; linear-SVM, support vector machine with linear kernel; LR, linear regression; NB, naive bayes; RBF-SVM, support vector machine with radial basis function kernel; RF, random forest; XGboost. extreme gradient boosting.



**eTable 4. Univariable Analysis on Radiomics Models and Clinical Factors Associated for pCR**

| Parameter                     | Unadjusted OR (95% CI) | P value |
|-------------------------------|------------------------|---------|
| Intra-tumoral model           |                        |         |
| Predicted non-pCR             | 1.00                   | -       |
| Predicted pCR                 | 27.81 (14.06, 58.33)   | <.001   |
| Peri-tumoral model            |                        |         |
| Predicted non-pCR             | 1.00                   | -       |
| Predicted pCR                 | 12.28 (6.69, 23.36)    | <.001   |
| Combined model                |                        |         |
| Predicted non-pCR             | 1.00                   | -       |
| Predicted pCR                 | 57.37 (25.07, 150.98)  | <.001   |
| Sex                           |                        |         |
| Male                          | 1.00                   | -       |
| Female                        | 1.03 (0.51,2.06)       | .92     |
| Age                           | 0.99 (0.96,1.02)       | .36     |
| Clinical T stage <sup>a</sup> |                        |         |
| T1b+T2                        | 1.00                   | -       |
| T3+T4a                        | 0.89 (0.46, 1.70)      | .72     |
| Clinical N stage              |                        |         |
| N0+N1                         | 1.00                   | -       |
| N2+N3                         | 0.62 (0.36, 1.04)      | .07     |
| Clinical stage group          |                        |         |
| I+II                          | 1.00                   | -       |
| III+IV A                      | 0.81 (0.38, 1.72)      | .99     |
| Tumor location                |                        |         |
| Proximal third                | 1.00                   | -       |
| Middle third                  | 0.58 (0.21, 1.53)      | .28     |
| Distal third                  | 0.58 (0.20, 1.56)      | .28     |
| Histologic Grade              |                        |         |
| 1                             | 1.00                   | -       |
| 2                             | 0.72 (0.20, 2.49)      | .60     |
| 3                             | 0.60 (0.16, 2.18)      | .43     |
| Smoking status                |                        |         |
| No                            | 1.00                   | -       |
| Yes                           | 0.90 (0.53, 1.53)      | .69     |
| Drinking status               |                        |         |
| No                            | 1.00                   | -       |
| Yes                           | 0.70 (0.41, 1.19)      | .19     |
| Family history of cancer      |                        |         |
| No                            | 1.00                   | -       |
| Yes                           | 1.13 (0.59, 2.15)      | .72     |

Abbreviations: pCR, pathologic complete response; OR, odds ratio.

<sup>a</sup> The American Joint Committee on Cancer TNM staging system (8<sup>th</sup> edition).

**eTable 5. Stratified Prediction Performance in Different Risk Subgroups**

| Characteristic                | No. of patients (%) | AUC (95% CI)        | P value <sup>a</sup> |
|-------------------------------|---------------------|---------------------|----------------------|
| Sex                           |                     |                     |                      |
| Male                          | 192 (83.1)          | 0.884 (0.833-0.934) | -                    |
| Female                        | 39 (16.9)           | 0.922 (0.841-1.000) | .436                 |
| Clinical T stage <sup>b</sup> |                     |                     |                      |
| T1b+T2                        | 46 (19.9)           | 0.885 (0.783-0.986) | -                    |
| T3+T4a                        | 185 (80.1)          | 0.890 (0.840-0.941) | .920                 |
| Clinical N stage              |                     |                     |                      |
| N0+N1                         | 119 (51.5)          | 0.897 (0.840-0.955) | -                    |
| N2+N3                         | 112 (48.5)          | 0.871 (0.797-0.945) | .579                 |
| Clinical stage group          |                     |                     |                      |
| I+II                          | 32 (13.9)           | 0.828 (0.674-0.982) | -                    |
| III+IV A                      | 199 (86.1)          | 0.896 (0.849-0.943) | .415                 |
| Tumor location                |                     |                     |                      |
| Proximal third                | 19 (8.2)            | 0.909 (0.780-1.000) | -                    |
| Middle third                  | 126 (54.5)          | 0.894 (0.834-0.954) | .839                 |
| Distal third                  | 86 (37.3)           | 0.877 (0.798-0.957) | .684                 |
| Histologic grade              |                     |                     |                      |
| 1                             | 11 (4.8)            | 0.867 (0.636-1.000) | -                    |
| 2                             | 153 (66.2)          | 0.884 (0.827-0.940) | .891                 |
| 3                             | 67 (29.0)           | 0.901 (0.819-0.984) | .788                 |
| Smoking status                |                     |                     |                      |
| No                            | 87 (37.7)           | 0.933 (0.876-0.989) | -                    |
| Yes                           | 144 (62.3)          | 0.859 (0.794-0.923) | .090                 |
| Drinking status               |                     |                     |                      |
| No                            | 139 (60.2)          | 0.929 (0.888-0.969) | -                    |
| Yes                           | 92 (39.8)           | 0.833 (0.740-0.925) | .065                 |
| Family history of cancer      |                     |                     |                      |
| No                            | 185 (80.1)          | 0.868 (0.813-0.922) | -                    |
| Yes                           | 46 (19.9)           | 0.977 (0.944-1.000) | <.001                |

Abbreviation: AUC, area under the receiver operating characteristic curve.

<sup>a</sup> P values were calculated by Delong test.

<sup>b</sup> The American Joint Committee on Cancer TNM staging system (8<sup>th</sup> edition).

**eTable 6. Clusters of Gene Sets for the Enrichment Analysis**

| Index | Clusters                                     | Maximum NES <sup>a</sup> |
|-------|----------------------------------------------|--------------------------|
|       | Combined and intra-tumoral models associated |                          |
| 1     | Interferon gamma                             | 2.8607                   |
| 2     | T cell proliferation                         | 2.6024                   |
| 3     | T cell mediated cytotoxicity                 | 2.5895                   |
| 4     | T helper cell immune response                | 2.5409                   |
| 5     | B cell activation                            | 2.4969                   |
| 6     | BCR signaling pathway                        | 2.4711                   |
| 7     | immune cell migration and chemotaxis         | 2.3976                   |
| 8     | TCR signaling pathway                        | 2.3804                   |
| 9     | B cell differentiation                       | 2.3777                   |
| 10    | IL-4 production                              | 2.3424                   |
| 11    | B cell mediated immunity                     | 2.3274                   |
| 12    | mast cell activation                         | 2.2924                   |
| 13    | Inflammatory response regulation             | 2.2648                   |
| 14    | IL-2 production                              | 2.26                     |
| 15    | Antigen processing and presentation          | 2.217                    |
| 16    | IL-1 production and secretion                | 2.2105                   |
| 17    | IL-10 production                             | 2.1619                   |
| 18    | IL-6 production and secretion                | 2.159                    |
| 19    | Tumor necrosis factor superfamily            | 2.1393                   |
| 20    | IL-12 production                             | 2.0523                   |
| 21    | Toll-like receptor                           | 1.8927                   |
| 22    | IL-13 production                             | 1.8136                   |
|       | Combined model associated only               |                          |
| 1     | Type I interferon production                 | 2.6705                   |
| 2     | lymphocyte apoptotic process                 | 2.2512                   |
| 3     | Viral process regulation                     | 2.2148                   |
| 4     | Defense response to virus                    | 2.0846                   |
| 5     | Natural killer cell activation               | 2.0557                   |
| 6     | Tyrosine phosphorylation of STAT protein     | 1.9987                   |
| 7     | Cytosolic calcium ion transport              | 1.9689                   |
| 8     | Monocyte differentiation                     | 1.8008                   |

Abbreviation: NES indicates normalized enrichment score.

<sup>a</sup> The NES of the gene set with the maximum value in a cluster.

**eTable 7. Numbers of Selected Features Through the Construction Procedure of the Combined Radiomics Model**

| Feature selection                 | Intra-tumoral features |             |              |                    |              |                |              | Peri-tumoral features |             |              |                    |              |                |              |
|-----------------------------------|------------------------|-------------|--------------|--------------------|--------------|----------------|--------------|-----------------------|-------------|--------------|--------------------|--------------|----------------|--------------|
|                                   | Shape                  | Original    |              | Wavelet filtration |              | LoG filtration |              | Shape                 | Original    |              | Wavelet filtration |              | LoG filtration |              |
|                                   |                        | First order | Second order | First order        | Second order | First order    | Second order |                       | First order | Second order | First order        | Second order | First order    | Second order |
| Initial number                    | 14                     | 18          | 75           | 144                | 600          | 90             | 375          | 14                    | 18          | 75           | 144                | 600          | 90             | 375          |
| Feature robustness                | 12                     | 17          | 69           | 142                | 536          | 87             | 345          | 9                     | 16          | 63           | 119                | 464          | 76             | 289          |
| Filtration on correlated features | 5                      | 6           | 18           | 44                 | 119          | 23             | 55           | 5                     | 12          | 22           | 71                 | 136          | 21             | 64           |
| RFA                               | 0                      | 0           | 0            | 1                  | 2            | 2              | 2            | 0                     | 0           | 1            | 2                  | 2            | 1              | 0            |

Abbreviations: LoG indicates Laplacian of Gaussian; RFA, Recursive feature addition.

**eAppendix 2.** Ranked Gene List

[https://github.com/chenyixie123/ESCC\\_spatial-heterogeneity](https://github.com/chenyixie123/ESCC_spatial-heterogeneity)
